# Supplementary material
Source: PubMed Central journal article supplement (PMC4641441)
Supplement: NIHMS735350-supplement-SI.pdf [file NIHMS735350-supplement-SI.pdf]

## Supplemental Information

### **Asp1 from *Schizosaccharomyces pombe* Binds a [2Fe-2S]<sup>2+</sup> Cluster Which Inhibits Inositol Pyrophosphate 1-Phosphatase Activity.**

Huanchen Wang,<sup>†</sup> Vasudha S. Nair,<sup>†</sup> Ashley A. Holland,<sup>‡</sup> Samanta Capolicchio,<sup>§</sup> Henning J. Jessen,<sup>§</sup> Michael K. Johnson,<sup>‡</sup> and  
Stephen B. Shears<sup>\*,†</sup>

<sup>†</sup>Laboratory of Signal Transduction, National Institute of Environmental Health Sciences, National Institutes of Health, 101 T.W. Alexander Drive, Research Triangle Park, North Carolina, 27709, USA. <sup>‡</sup>Department of Chemistry and Center for Metalloenzyme Studies, University of Georgia, Athens, GA 30602. <sup>§</sup>Department of Chemistry, University of Zurich (UZH), Winterthurerstrasse 190, 8057 Zurich, Switzerland.

\*Corresponding author: email [shears@niehs.nih.gov](mailto:shears@niehs.nih.gov)

### Supplementary Table 1. A list of Mutagenic Primers

C448S 5'-CTACCAACCTTGCTACAGAACTCAAATTCCGAAAGATATCAACAAGTTAAAACAGTTACGC  
3'-GCGTAACTGTTTTAACTTGTTGATATCTTCGGATTTGAGTTCTGTAGCAAGGTTGGTAG

C523S 5'-GTTTCATAAGGACCTGTATATTATGAATCGTGATTCCCTGAAAGATGTCGAAATATACACATCTTCTG  
3'-CAGAAGATGTGTATATTTTCGACATCTTTCAGGAATCACGATTTCATAATATACAGGTCCTTATGAAAC

C607S 5'-CCAGAAAACATGCCCAAGCCTTCTGAAAGTAATGCAACAAGTTGTTCAACTCATG  
3'-CATGAGTTGAACAACTTGTTGCATTACTTAGAAGGCTTGGGCATGTTTTCTGG

C643S/C644S 5'-GTTGAGCAAGTTCAATCGCGTTGGTTCTTCTAATGAAAATCCTGCGCTCTTTAGGG  
3'-CCCTAAAGAGCGCAGGATTTTCATTAGAAGACCAACGCGATTGAACTTGCTCAAC

C663S 5'-GTGGGAGAAGTTGTTTAGCGAATTTTCTGACTCTGAGAAAGCAGACCC  
3'-GGGTCTGCTTTCTCAGAGTCAGAAAATTCGCTAAACAACTTCTCCAC

C814S 5'-CTATACCTTGCTTAATTCTTATACTTGAATCAGGACTACCTATG  
3'-GGTAGTCCTGATTCAAGTATAGAATTAAGCAAGGTATAGATATG

C839S 5'-TCTCACTCAAATATCCTTTGAGTTATTCGAGAGGACTAATC  
3'-GTCCTCTCGAATAACTCAAAGGATATTTGAGTGAGATAATC

C864S 5'-CTCTCACCAGGTTCTTATGCCCAATGTCCATTGG  
3'-GGACATTGGGCATAAGAACCTGGTGAGAGTG

C868S 5'-CCAGGTTGTTATGCCCAATTCTCCATTGGATATGAATCTTG  
3'-TATCCAATGGAGATTGGGCATAACAACCTGGTGAG

C879S 5'-GTCCATTGGATATGAATCTTGATGCTAAACACTTCTATTAGCGTTTCACCTCGCAGGTC  
3'-GACCTGCGAGGTGAAACGCTAATGAGAGTGTTTAGCATCAAGATTTCATATCCAATGGAC

C905S 5'-GTTTATAACGAAAACCGAGGACCTC**TCCA**ACTCAGTTCATCTTCCCAAAGG  
3'-CCTTTTGGGAAGATGAACTGAGTTG**GAGAGG**TCCTCGGTTTTCGTTATAAAC

H807A 5'-GTACTTTACTAAAGAGTCT**GCT**CTATCTATACCTTGCTTAATTGTATAC  
3'-CAATTAAGCAAGGTATAGAT**AGC**CAGACTCTTTAGTAAAGTACATTCTTG

Pairs of complementary primers were designed as shown below, with mutagenic codons underlined and in bold font. The sequences of each mutant were verified.

## Supplementary Figure S1. Multiple Sequence Alignment of hPPIP5K2, hPPIP5K1 and Asp1

**A**

|           |     |                                                                                                                                    |
|-----------|-----|------------------------------------------------------------------------------------------------------------------------------------|
| hPPIP5K2  | 363 | EAEDIPIVPTTSGT <b>MMELRCVIAVIR</b> HGDRTPKQ <b>KMKMEV</b> RH <b>QKFFDLFEK</b> CDGYKSGK <b>LK</b> LKK <b>PKQLQE</b>                 |
| hPPIP5K1  | 374 | EAEDIPIVPTTSGT <b>MMELRCVIAIIR</b> HGDRTPKQ <b>KMKMEV</b> KH <b>PRFFALFEK</b> HGGYKTGK <b>LK</b> LKR <b>PEQLQE</b>                 |
| Asp1      | 371 | SVQEVLNPPPRESE <b>AWRLKSLVGVLR</b> HADRTPKQ <b>KFKFS</b> F <b>TS</b> <b>DPFVKLLQ</b> GHT----- <b>EEVILRNEQLNS</b>                  |
| Consensus |     | <i>php-1..sPspptp</i> <b>hhcL+tlltllRHtDRTPKQKkh</b> <i>hp</i> <b>pp..Fh.Lhp.hs.....cb.lb+scQLpp</b>                               |
| hPPIP5K2  | 433 | <b>VLDIARQLLME</b> LGQNNNSEIEEN <b>KPKLEQLKTV</b> LEMYGHFSGIN <b>RKVQLTYL</b> PHGCPKTS- <b>SEEDSRRE</b>                            |
| hPPIP5K1  | 444 | <b>VLDITRLLLAEL</b> EKEPGGE <b>IEEKTGKLEQLKSV</b> LEMYGHFSGIN <b>RKVQLTY</b> YPHGKASNEGQDPQRETL                                    |
| Asp1      | 436 | <b>VLAATNLATEL</b> -----KCED <b>INKLKLRLALE</b> TKKDLPGTK <b>VQLKP</b> PAYSPEGKL-----                                              |
| Consensus |     | <b>VLshhp</b> <i>bhh.b.....b.Ep.sKlcQL+.hLEhb.chsGhp.plp.hY.PcG.....</i>                                                           |
| hPPIP5K2  | 502 | EPS <b>LLLLVLK</b> WGGE <b>LTPAGRVQAEELGRA</b> FRCMYPGGQGDYAGFP <b>GCGLLR</b> LHSTYRHD <b>LKIYAS</b> DEGR <b>VQ</b>                |
| hPPIP5K1  | 514 | AP <b>LLLLVLK</b> WGGE <b>LTPAGRVQAEELGRA</b> FRCMYPGGQGDYAGFP <b>GCGLLR</b> LHSTFRHD <b>LKIYAS</b> DEGR <b>VQ</b>                 |
| Asp1      | 485 | - <b>LKLQLI</b> IKWGGE <b>FTHSARYQSKDLGEQFHK</b> ----- <b>DLYIMNRDCLK</b> DE <b>VEIYTS</b> SER <b>RV</b> S                         |
| Consensus |     | <i>..pLbLllKWGGEht.ttrhQtc-LGc.F+.....sLh.hpps</i> <b>h.+DlcIYhSsE.RVp</b>                                                         |
| hPPIP5K2  | 572 | <b>MTAAAFAKGLL</b> ALEGE <b>LTPILVQMVKSANM</b> NGLLDSDSD <b>SLS</b> SC <b>QQRVKARL</b> HEILQKDRD <b>FTA-EDYEK</b>                  |
| hPPIP5K1  | 584 | <b>MTAAAFAKGLL</b> ALEGE <b>LTPILVQMVKSANM</b> NGLLDSDGD <b>SLS</b> SC <b>QHRVKARL</b> HHILQDAP <b>FGP-EDYDQ</b>                   |
| Asp1      | 539 | <b>ASAEIFAMAF</b> LEQET- <b>IPSDLKVRKD</b> ----- <b>LLD-DSNAAKDTMDK</b> VKK <b>HLSLLRV</b> GD <b>TARKEFTWPE</b>                    |
| Consensus |     | <i>hoA.hFA</i> <b>bthL.bEs.lss.Llph.Ks.....LLD.Dtst</b> <i>hps</i> <b>hbp+VK.+L+p</b> <i>lLp.s.sh...bs@.p</i>                      |
| hPPIP5K2  | 641 | LTPSGS <b>ISLIKSM</b> HLI <b>KNPVKTCDKVYS</b> LIQSL <b>TSQIRHR</b> ME <b>DPKSSDIQ</b> LYHSET <b>LELMLRR</b> WSK <b>LEKD</b>        |
| hPPIP5K1  | 653 | LAP <b>TRSTLLNS</b> M <b>TI</b> I <b>QNPVKVCDQV</b> FAL <b>IENTHQIRER</b> M <b>QDPRSVDLQ</b> LYHSET <b>LELMLQR</b> WSK <b>LERD</b> |
| Asp1      | 602 | NMP <b>KPCEVMQ</b> Q <b>VVQLMKYHRA</b> VMREN <b>FIILGPEVEQVQSR</b> ----- <b>WCCNENPALFRER</b> WE <b>KLFS</b> E                     |
| Consensus |     | <i>.hPp.t.shbps</i> <i>hplhp....hhcps@.ll.sbh</i> <b>pQlppR.....hhhsEs..Lh.pRWpKLbp-</b>                                           |

|                  |      |                                                                             |
|------------------|------|-----------------------------------------------------------------------------|
| hPPIP5K2         | 711  | FKTKNGRYDISKI PDIYDCIKYDVQHNGSLK-----                                       |
| hPPIP5K1         | 723  | FRQKSGRYDISKI PDIYDCVKYDVQHNGSLG-----                                       |
| Asp1             | 662  | FCDS-EKADPSKVSELYDTLKYDALHNRQFLERI FTPYQYLKLPQS PSLIAKEPPQRTDSNGNLVGMTGA    |
| <u>Consensus</u> |      | F. pp. .+hD. SKls-lyDhLKYDhbHN. ph. ....                                    |
| hPPIP5K2         | 742  | -----LENTMELYRLSKALADIVIPQEYGITKAEKLEIAKGYCTPLVRKIRSDLQRTQDDDTVKNKLH        |
| hPPIP5K1         | 754  | -----LQGTAEELLRLSKALADVIPQEYGISREEKLEIAVGFCPLLRKILLDLQRTHEDESVKNKLH         |
| Asp1             | 731  | NTNHTERPLEKLYELYDLAKVLFDFVSPQEYGIEPKEKLEIGLLTSVPLLRQIIHDIKEA-----           |
| <u>Consensus</u> |      | .....Lp. hhELhcLtkhLhdhv. PQEYGIp. .EKLEit. .hthPLlrpI. .Dlpch.....         |
| hPPIP5K2         | 804  | PVYSRGVLSPERHVRTRLYFTSESHVHSLLSILRYGALCNESKDEQWKRAMDYLNVVNELNYMTQIVIML      |
| hPPIP5K1         | 816  | PLYSRGVLSPGRHVRTRLYFTSESHVHSLLSVFRYGLLDETQDAQWQRALDYLSAISELNYMTQIVIML       |
| Asp1             | 791  | -----RSDHASTRMYFTKESH IYTLNLCILESGLPMKLP RN-----QIPELDYLTQICFEL             |
| <u>Consensus</u> |      | .....ps. chhpTRhyFTpESHl@oLLshh. bttL. .c. .c. ....lsELsYhtQIhhbL           |
| hPPIP5K2         | 874  | YEDPNKDLSSSEERFHVELHFSPGAKGCEEDKNLPSGYGYRPAARENEGRRPFKIDNDDEPHTSKRDEVDR     |
| hPPIP5K1         | 886  | YEDNTQDPLSEERFHVELHFSPGVKGVVEEGSAPAGCGFRPASSENEEMKTNQGS MENLCPGKASDEPDR     |
| Asp1             | 843  | FERTN--PSGNKEFSVRITLS-----PGCYAQCP LDM-----                                 |
| <u>Consensus</u> |      | @EcSS. ....tpccFpVclhhS. ....Ptthtb. Phs.....                               |
| hPPIP5K2         | 944  | AVILFKPMVSEPIHIHRKSP LPRSRKTATNDVVS ENA-----                                |
| hPPIP5K1         | 956  | AL-QTSPQPPEGPG LPRRSPLIRNRKAGSMEVMNMQCTGNL DLIPLRGRRCRRS GDL PQPSLAI GLQPRA |
| Asp1             | 873  | -----NLDA-----                                                              |
| <u>Consensus</u> |      | .....phss.....                                                              |
| hPPIP5K2         | 981  | -----NYLRT-----                                                             |
| hPPIP5K1         | 1025 | VSTTHLASCTQVLSETSSSRPGGYRLFS SSRPPT EMKQSG LGSQCTGLFSTTVLGGSS SAPNLQDYARSH  |
| Asp1             |      | -----                                                                       |
| <u>Consensus</u> |      | .....                                                                       |

```

hPPIP5K2      986  -----PRTLVEQKQNPTVGFELYSMVPSICPLETLHNALS LKQVDEFLASIASP
hPPIP5K1     1095 GKKLPPASLKH RDELLFVPAVKRFSVSFAKHPTNGFEGCSMVPTIYPLETLHNALS LRVSEFLSRVCQR
Asp1         877  -----KHCISVSPRR---SLTRHLDLQQFITKTEDLCNS
                                     *                               *
Consensus    .....c.h..Vss.....oLhp hLsLpQh.pbh.pltp..

```

```

hPPIP5K2      1035 SSDVPRKTAEISSTALRSSPIMRKKVSLNNTYTPAKIL
hPPIP5K1     1165 HTDAQAQ-----ASAALFDSMHSSQASDNPFSPRTL
Asp1         908  V-----LPKRFPVNI-
Consensus    .....p.@.Psp h.

```

## B

```

hPPIP5K2      917  GAKGCEEDKNLPSGYGYRPASRENEGRRPFKIDNDDEPHTSKRDEVDR
hPPIP5K1      908  GVKGVVEEGSAPAGCGFRPASSENEEMKTNQGS MENLCPGKASDEPDR
Asp1         863  -----GCY AQ-----CPLDMNLD AKH
                                     *                               *
Consensus    .....Gh.hb.....s....p.-sc+

```

**Panel A** The alignment shown is the raw output – no manual adjustments – as generated by PROMALS3D, a sequence and structure alignment server (<http://prodata.swmed.edu/promals3d/promals3d.php>). Residues 371 to 920 of Asp1 from *S. pombe* (Accession number O74429.1) were aligned with the corresponding regions of the human isoforms of PPIP5K1 (XP\_011520555) and PPIP5K2 (XP\_005271995) in a two-stage process; first we aligned the predicted, highly-structured regions up to Ser994, Ser896 and Ser861 in hPPIP5K2, hPPIP5K1 and Asp1, respectively. A second alignment was then separately performed for the remaining, largely unstructured regions. Default settings were used with the exception of (i) increasing, to a value of 1.0, the identity threshold above which fast alignment is applied, and (ii) employing PROMALS rather than MAFFT at the first alignment stage.

**Panel B:** The indicated section of the alignment was adjusted manually. Note the higher degree of conservation of this short Asp1 sequence with that in hPPIP5K1 compared to hPPIP5K2.

Red font depicts predicted alpha-helix, blue font denotes predicted beta-strand. The consensus symbols (where they apply to all three sequences) are those generated by the algorithm's output: fully conserved amino acids are in bold and uppercase letters; aliphatic (I, V, L) = *l*; aromatic (Y, H, W, F) = *@*; hydrophobic (W, F, Y, M, L, I, V, A, C, T, H) = *h*; alcohol (S, T) = *o*; polar residues (D, E, H,

K, N, Q, R, S, T) = p; tiny (A, G, C, S) = t; small (A, G, C, S, V, N, D, T, P) = s; bulky residues (E, F, I, K, L, M, Q, R, W, Y) = b; positively charged (K, R, H) = +; negatively charged (D, E) = -; charged (D, E, K, R, H) = c. The asterisks highlight Cys in Asp1 that are aligned with Cys in hPPIP5K1. The catalytically-essential His807 in Asp1 is underlined, to highlight its conservation in hPPIP5K1 and hPPIP5K2.
